# Supplementary material for: Comparison of the volatile organic compounds in Citrus reticulata ‘Chachi’ peel with different drying methods using E-nose, GC-IMS and HS-SPME-GC-MS
Source: Front Plant Sci. 2023 May 17;14:1169321. doi: 10.3389/fpls.2023.1169321 (PMC10231685; doi:10.3389/fpls.2023.1169321)
Supplement: Supplementary Table 1 — Volatile flavor compounds in CRCP with different drying methods by HS-SPME-GC-MS. [file Table_1.xlsx]

## Sheet: Sheet1
	Class	Compounds	Formula	CAS	NIST_RI
1	Acid	Bicyclo[2.2.1]heptan-2-ol, 1,7,7-trimethyl-, formate, endo-	C11H18O2	7492-41-3	1226
2	Acid	6-Octenoic Acid, 3,7-dimethyl-	C10H18O2	502-47-6	1314
3	Acid	Neric Acid	C10H16O2	4613-38-1	1344
4	Acid	Cyclopropanecarboxylic Acid, 2,2-dimethyl-3-(2-methyl-1-propenyl)-, (1R-trans)-	C10H16O2	4638-92-0	1284
5	Acid	1-Methylcyclohexylcarboxylic Acid	C8H14O2	1123-25-7	1210
6	Acid	Benzeneacetic acid	C8H8O2	103-82-2	1262
7	Acid	Hexanoic Acid	C6H12O2	142-62-1	990
8	Acid	Butanoic Acid, 4-hydroxy-	C4H8O3	591-81-1	933
9	Alcohol	Lanceol, cis	C15H24O	10067-28-4	1763
10	Alcohol	1-Tetradecanol	C14H30O	112-72-1	1676
11	Alcohol	Benzenemethanol, .alpha.-2-cyclohexen-1-yl-	C13H16O	5723-89-7	1598
12	Alcohol	Undecanol-5	C11H24O	37493-70-2	1288
13	Alcohol	2,7-Octadiene-1,6-diol, 2,6-dimethyl-, (Z)-	C10H18O2	103619-06-3	1361
14	Alcohol	3,7-Octadiene-2,6-diol, 2,6-dimethyl-	C10H18O2	13741-21-4	1193
15	Alcohol	2,6-Dimethyl-1-nonen-3-yn-5-ol	C11H18O	19780-98-4	1300
16	Alcohol	Tryptophol	C10H11NO	526-55-6	1769
17	Alcohol	1-Decanol	C10H22O	112-30-1	1272
18	Alcohol	3-Cyclohexen-1-ol, 1-methyl-4-(1-methylethyl)-	C10H18O	586-82-3	1137
19	Alcohol	Cyclohexanol, 2-methyl-3-(1-methylethenyl)-, (1.alpha.,2.alpha.,3.alpha.)-	C10H18O	54244-81-4	1196
20	Alcohol	2-Cyclohexen-1-ol, 3-methyl-6-(1-methylethyl)-, trans-	C10H18O	16721-39-4	1208
21	Alcohol	3-Cyclohexene-1-ethanol, .beta.,4-dimethyl-	C10H18O	18479-68-0	1295
22	Alcohol	1,7,7-Trimethylbicyclo[2.2.1]heptan-2-ol	C10H18O	10385-78-1	1138
23	Alcohol	2,4-Decadien-1-ol	C10H18O	14507-02-9	1274
24	Alcohol	1,5,7-Octatrien-3-ol, 3,7-dimethyl-	C10H16O	29957-43-5	1107
25	Alcohol	Hotrienol	C10H16O	20053-88-7	1106
26	Alcohol	1,4-Cyclohexadiene-1-methanol, 4-(1-methylethyl)-	C10H16O	22539-72-6	1330
27	Alcohol	p-Cymen-7-ol	C10H14O	536-60-7	1289
28	Alcohol	Benzeneethanol, .alpha.,.alpha.-dimethyl-	C10H14O	100-86-7	1159
29	Alcohol	1,2-Octanediol	C8H18O2	1117-86-8	1204
30	Alcohol	2-Nonanol	C9H20O	628-99-9	1102
31	Alcohol	2-Nonen-1-ol	C9H18O	22104-79-6	1105
32	Alcohol	1-Nonen-4-ol	C9H18O	35192-73-5	1103
33	Alcohol	3,6-Nonadien-1-ol, (E,Z)-	C9H16O	56805-23-3	1156
34	Alcohol	3-Phenylpropanol	C9H12O	122-97-4	1233
35	Alcohol	2-Propen-1-ol, 3-phenyl-	C9H10O	104-54-1	1310
36	Alcohol	1-Hexanol, 2-ethyl-	C8H18O	104-76-7	1030
37	Alcohol	Cyclooctyl Alcohol	C8H16O	696-71-9	1155
38	Alcohol	3-Cyclopentyl-1-propanol	C8H16O	767-05-5	1102
39	Alcohol	3,4-Dimethylcyclohexanol	C8H16O	5715-23-1	1126
40	Alcohol	2-Methylbut-2-en-1-yl acetate	C7H12O2	33425-30-8	921
41	Alcohol	2-Buten-1-ol, 3-methyl-, acetate	C7H12O2	1191-16-8	918
42	Alcohol	Benzenemethanol, 4-methyl-	C8H10O	589-18-4	1106
43	Alcohol	Ethanol, 2-butoxy-	C6H14O2	111-76-2	907
44	Alcohol	1-Hexanol, 4-methyl-	C7H16O	818-49-5	953
45	Alcohol	2-Cyclopentylethanol	C7H14O	766-00-7	1003
46	Alcohol	2,4-Heptadien-1-ol, (E,E)-	C7H12O	33467-79-7	1004
47	Alcohol	1-Propanol, 3-(methylthio)-	C4H10OS	505-10-2	981
48	Alcohol	1,4-Pentanediol	C5H12O2	626-95-9	923
49	Alcohol	2-Hexanol	C6H14O	626-93-7	801
50	Alcohol	3-Hexen-1-ol, (E)-	C6H12O	928-97-2	852
51	Alcohol	2-Furanmethanol	C5H6O2	98-00-0	851
52	Alcohol	1,3-Butanediol	C4H10O2	107-88-0	787
53	Alcohol	2,3-Butanediol	C4H10O2	513-85-9	788
54	Aldehyde	Dodecanal	C12H24O	112-54-9	1409
55	Aldehyde	3-Hexene, 1-(1-ethoxyethoxy)-, (Z)-	C10H20O2	28069-74-1	1102
56	Aldehyde	Undecanal	C11H22O	112-44-7	1307
57	Aldehyde	10-Undecenal	C11H20O	112-45-8	1297
58	Aldehyde	OxiranecarboxAldehyde, 3-methyl-3-(4-methyl-3-pentenyl)-	C10H16O2	16996-12-6	1234
59	Aldehyde	Lilac Aldehyde C	C10H16O2	53447-48-6	1167
60	Aldehyde	4-Decenal, (E)-	C10H18O	65405-70-1	1198
61	Aldehyde	cis-7-Decen-1-al	C10H18O	21661-97-2	1212
62	Aldehyde	(E)-2-Decenal	C10H18O	3913-81-3	1263
63	Aldehyde	2-Isopropyl-5-methylhex-2-enal	C10H18O	35158-25-9	1106
64	Aldehyde	2-Decenal, (Z)-	C10H18O	2497-25-8	1252
65	Aldehyde	(2E,4Z)-2,4-Decadienal	C10H16O	25152-83-4	1295
66	Aldehyde	6-Octenal, 7-methyl-3-methylene-	C10H16O	55050-40-3	1147
67	Aldehyde	5-propan-2-ylbicyclo[3.1.0]hex-2-ene-2-carbAldehyde	C10H14O	57129-54-1	1190
68	Aldehyde	1-Cyclohexene-1-carboxAldehyde, 4-(1-methylethenyl)-, (S)-	C10H14O	18031-40-8	1207
69	Aldehyde	1-Cyclohexene-1-carboxAldehyde, 4-(1-methylethenyl)-	C10H14O	2111-75-3	1274
70	Aldehyde	4-Isopropylcyclohexa-1,3-dienecarbAldehyde	C10H14O	1197-15-5	1283
71	Aldehyde	Nonanal	C9H18O	124-19-6	1104
72	Aldehyde	6-Nonenal, (Z)-	C9H16O	2277-19-2	1101
73	Aldehyde	2-Nonenal, (E)-	C9H16O	18829-56-6	1162
74	Aldehyde	4-Nonenal, (E)-	C9H16O	2277-16-9	1105
75	Aldehyde	2-Nonenal	C9H16O	2463-53-8	1161
76	Aldehyde	2,5-ThiophenedicarboxAldehyde	C6H4O2S	932-95-6	1220
77	Aldehyde	2,6-Nonadienal, (E,Z)-	C9H14O	557-48-2	1155
78	Aldehyde	2,4-Nonadienal, (E,E)-	C9H14O	5910-87-2	1216
79	Aldehyde	BenzAldehyde, 3-methoxy-	C8H8O2	591-31-1	1196
80	Aldehyde	BenzAldehyde, 2,5-dimethyl-	C9H10O	5779-94-2	1208
81	Aldehyde	BenzeneacetAldehyde, 4-methyl-	C9H10O	104-09-6	1120
82	Aldehyde	1,4-BenzenedicarboxAldehyde	C8H6O2	623-27-8	1284
83	Aldehyde	ParAldehyde	C6H12O3	123-63-7	776
84	Aldehyde	Octanal	C8H16O	124-13-0	1006
85	Aldehyde	2-Heptenal, 2-methyl-	C8H14O	30567-26-1	990
86	Aldehyde	BenzAldehyde, 4-methyl-	C8H8O	104-87-0	1079
87	Aldehyde	BenzAldehyde, 2-methyl-	C8H8O	529-20-4	1064
88	Aldehyde	BenzAldehyde, 3-methyl-	C8H8O	620-23-5	1071
89	Aldehyde	Heptanal	C7H14O	111-71-7	903
90	Aldehyde	4-Heptenal, (Z)-	C7H12O	6728-31-0	900
91	Aldehyde	CyclohexanecarboxAldehyde	C7H12O	2043-61-0	963
92	Aldehyde	4-Heptenal	C7H12O	62238-34-0	899
93	Aldehyde	2-FurancarboxAldehyde, 5-methyl-	C6H6O2	620-02-0	978
94	Aldehyde	BenzAldehyde	C7H6O	100-52-7	960
95	Aldehyde	Hexanal	C6H12O	66-25-1	801
96	Amine	1,6-HexanediAmine, N,N,N',N'-tetramethyl-	C10H24N2	111-18-2	1206
97	Amine	1-ButanAmine, N-methyl-N-2-propenyl-	C8H17N	24209-62-9	856
98	Amine	Pyrazinamide	C5H5N3O	98-96-4	1250
99	Amine	Niacinamide	C6H6N2O	98-92-0	1419
100	Amine	BenzenAmine, N-ethyl-	C8H11N	103-69-5	1128
101	Amine	BenzenAmine, 2-ethyl-	C8H11N	578-54-1	1205
102	Amine	BenzenAmine, 2,4-dimethyl-	C8H11N	95-68-1	1167
103	Amine	Glutarimide	C5H7NO2	1121-89-7	1154
104	Amine	N,N-Dimethylacetamide	C4H9NO	127-19-5	942
105	Amine	Methacrylamide	C4H7NO	79-39-0	1149
106	Aromatics	[2H8]-Acetophenone	C6D5COCD3	19547-00-3	1066.61
107	Aromatics	4-Acetoxy-3-methoxystyrene	C11H12O3	46316-15-8	1452
108	Aromatics	Diphenylmethane	C13H12	101-81-5	1434
109	Aromatics	Benzoic acid, 1-methylethyl ester	C10H12O2	939-48-0	1217
110	Aromatics	Naphthalene, 1,6-dimethyl-	C12H12	575-43-9	1422
111	Aromatics	Benzene, (1-methoxypropyl)-	C10H14O	59588-12-4	1104
112	Aromatics	2-Methoxy-4-vinylphenol	C9H10O2	7786-61-0	1316
113	Aromatics	Benzene, pentamethyl-	C11H16	700-12-9	1260
114	Aromatics	TRANS-ANETHOLE	C10H12O	4180-23-8	1283
115	Aromatics	Benzene, 1-methoxy-4-(1-propenyl)-, (Z)-	C10H12O	25679-28-1	1254
116	Aromatics	2-Naphthalenol	C10H8O	135-19-3	1521
117	Aromatics	Benzene, 1,2-dimethoxy-	C8H10O2	91-16-7	1148
118	Aromatics	Benzene, 1-methyl-4-nitro-	C7H7NO2	99-99-0	1212
119	Aromatics	p-Cymene	C10H14	99-87-6	1027
120	Aromatics	Benzene, 1,2,3,5-tetramethyl-	C10H14	527-53-7	1117
121	Aromatics	Benzene, 2-ethyl-1,4-dimethyl-	C10H14	1758-88-9	1076
122	Aromatics	Benzene, (methoxymethyl)-	C8H10O	538-86-3	969
123	Aromatics	Benzene, 1-ethyl-3-methyl-	C9H12	620-14-4	957
124	Aromatics	Benzene, 1,2,3-trimethyl-	C9H12	526-73-8	1013
125	Aromatics	Benzene, (1-methylethyl)-	C9H12	98-82-8	922
126	Aromatics	Benzene, 1,2,4-trimethyl-	C9H12	95-63-6	990
127	Aromatics	.alpha.-Methylstyrene	C9H10	98-83-9	986
128	Aromatics	Styrene	C8H8	100-42-5	893
129	Aromatics	Toluene	C7H8	108-88-3	763
130	Ester	Geranyl isovalerate	C15H26O2	109-20-6	1606
131	Ester	Bornyl tiglate	C15H24O2	101223-92-1	1615
132	Ester	1,5-Dimethyl-1-vinyl-4-hexenyl butyrate	C14H24O2	78-36-4	1418
133	Ester	Hexanoic acid, anhydride	C12H22O3	2051-49-2	1517
134	Ester	2-Propenoic acid, 2-methyl-, 3,3,5-trimethylcyclohexyl ester	C13H22O2	7779-31-9	1353
135	Ester	E-2-Hexenyl benzoate	C13H16O2	76841-70-8	1588
136	Ester	Undecanoic acid, methyl ester	C12H24O2	1731-86-8	1428
137	Ester	Butanoic acid, 1-ethenylhexyl ester	C12H22O2	16491-54-6	1307
138	Ester	Linalyl acetate	C12H20O2	115-95-7	1257
139	Ester	Isobornyl acetate	C12H20O2	125-12-2	1286
140	Ester	2,6-Octadien-1-ol, 3,7-dimethyl-, acetate, (Z)-	C12H20O2	141-12-8	1362
141	Ester	Fenchyl acetate	C12H20O2	13851-11-1	1224
142	Ester	.alpha.-Terpinyl acetate	C12H20O2	80-26-2	1350
143	Ester	Iso-3-thujyl acetate	C12H20O2	62181-90-2	1298
144	Ester	Geranyl acetate	C12H20O2	105-87-3	1382
145	Ester	Bicyclo[3.1.0]hexan-3-ol, 4-methylene-1-(1-methylethyl)-, acetate	C12H18O2	3536-54-7	1292
146	Ester	2-Cyclohexen-1-ol, 2-methyl-5-(1-methylethenyl)-, acetate	C12H18O2	97-42-7	1336
147	Ester	Butanoic acid, 1-methylhexyl ester	C11H22O2	39026-94-3	1218
148	Ester	Nonanoic acid, 9-oxo-, methyl ester	C10H18O3	1931-63-1	1436
149	Ester	2-Ethylhexyl acrylate	C11H20O2	103-11-7	1220
150	Ester	6-Nonen-1-ol, acetate, (Z)-	C11H20O2	76238-22-7	1308
151	Ester	4-Decenoic acid, methyl ester, Z-	C11H20O2	7367-83-1	1323
152	Ester	cis-3-Hexenyl isovalerate	C11H20O2	35154-45-1	1238
153	Ester	n-Valeric acid cis-3-hexenyl ester	C11H20O2	35852-46-1	1237
154	Ester	Isobornyl formate	C11H18O2	1200-67-5	1233
155	Ester	Geranyl formate	C11H18O2	105-86-2	1301
156	Ester	1,6-Octadien-3-ol, 3,7-dimethyl-, formate	C11H18O2	115-99-1	1215
157	Ester	Furfuryl pentanoate	C10H14O3	36701-01-6	1232
158	Ester	Methyl 6,6-dimethylbicyclo[3.1.1]hept-2-ene-2-carboxylate	C11H16O2	30649-97-9	1301
159	Ester	Ethyl mandelate	C10H12O3	774-40-3	1421
160	Ester	Benzoic acid, 2-(dimethylamino)-, methyl ester	C10H13NO2	10072-05-6	1404
161	Ester	p-Tolyl isobutyrate	C11H14O2	103-93-5	1290
162	Ester	Butanoic acid, 2-methyl-, 2-methylbutyl ester	C10H20O2	2445-78-5	1105
163	Ester	Butanoic acid, 3-methyl-, 3-methylbutyl ester	C10H20O2	659-70-1	1104
164	Ester	Acetic acid, octyl ester	C10H20O2	112-14-1	1210
165	Ester	Hexanoic acid, 2-methylpropyl ester	C10H20O2	105-79-3	1149
166	Ester	Butanoic acid, 3-methyl-, 2-methylbutyl ester	C10H20O2	2445-77-4	1107
167	Ester	Butanoic acid, 2-methyl-, 3-methylbutyl ester	C10H20O2	27625-35-0	1101
168	Ester	Butanoic acid, hexyl ester	C10H20O2	2639-63-6	1192
169	Ester	Butanoic acid, 4-hexenyl ester, (Z)-	C10H18O2	69727-41-9	1203
170	Ester	Butanoic acid, 3-hexenyl ester, (Z)-	C10H18O2	16491-36-4	1187
171	Ester	2-Butenoic acid, 3-hexenyl ester, (E,Z)-	C10H16O2	65405-80-3	1199
172	Ester	2-Furanpropanoic acid, ethyl ester	C9H12O3	10031-90-0	1192
173	Ester	Benzoic acid, 2-propenyl ester	C10H10O2	583-04-0	1254
174	Ester	Hexanoic acid, 3-hydroxy-, ethyl ester	C8H16O3	2305-25-1	1133
175	Ester	Butanoic acid, 2-methyl-, 2-methylpropyl ester	C9H18O2	2445-67-2	1004
176	Ester	Formic acid, octyl ester	C9H18O2	112-32-3	1114
177	Ester	Acetic acid, heptyl ester	C9H18O2	112-06-1	1112
178	Ester	Propanoic acid, hexyl ester	C9H18O2	2445-76-3	1108
179	Ester	Isobutyl isovalerate	C9H18O2	589-59-3	1005
180	Ester	Propanoic acid, 2-methyl-, 2-methylbutyl ester	C9H18O2	2445-69-4	1016
181	Ester	Methyl salicylate	C8H8O3	119-36-8	1192
182	Ester	Methyl anthranilate	C8H9NO2	134-20-3	1343
183	Ester	Benzeneacetic acid, methyl ester	C9H10O2	101-41-7	1178
184	Ester	Acetic acid, phenylmethyl ester	C9H10O2	140-11-4	1162
185	Ester	Pentanoic acid, 2-hydroxy-4-methyl-, methyl ester	C7H14O3	40348-72-9	989
186	Ester	Butanoic acid, 2-methyl-, propyl ester	C8H16O2	37064-20-3	946
187	Ester	Pentanoic acid, 2-methyl-, ethyl ester	C8H16O2	39255-32-8	941
188	Ester	Heptanoic acid, methyl ester	C8H16O2	106-73-0	1023
189	Ester	Butanoic acid, 3-methyl-, propyl ester	C8H16O2	557-00-6	946
190	Ester	Acetic acid, hexyl ester	C8H16O2	142-92-7	1014
191	Ester	5-Isoxazolecarboxylic acid, 4,5-dihydro-5-methyl-, methyl ester, (R)-	C6H9NO3	64018-42-4	1010
192	Ester	Ethyl 2-hexenoate, trans-	C8H14O2	27829-72-7	1049
193	Ester	3-Hexen-1-ol, acetate, (Z)-	C8H14O2	3681-71-8	1009
194	Ester	Cyclohexanecarboxylic acid, methyl ester	C8H14O2	4630-82-4	1010
195	Ester	2-Hexen-1-ol, acetate, (E)-	C8H14O2	2497-18-9	1015
196	Ester	2-Propenoic acid, pentyl ester	C8H14O2	2998-23-4	974
197	Ester	3-Hexen-1-ol, acetate, (E)-	C8H14O2	3681-82-1	1005
198	Ester	Ethyl (methylthio)acetate	C5H10O2S	4455-13-4	989
199	Ester	Butanoic acid, 3-hydroxy-, ethyl ester	C6H12O3	5405-41-4	943
200	Ester	Hexanoic acid, methyl ester	C7H14O2	106-70-7	925
201	Ester	Pantolactone	C6H10O3	599-04-2	1148
202	Ester	3-Hexen-1-ol, formate, (Z)-	C7H12O2	33467-73-1	920
203	Ester	2-Butenoic acid, 2-methyl-, ethyl ester	C7H12O2	55514-48-2	937
204	Ester	Ethyl tiglate	C7H12O2	5837-78-5	939
205	Ester	Cyclopentanol, acetate	C7H12O2	933-05-1	927
206	Ester	4-Pentenyl Acetate	C7H12O2	1576-85-8	896
207	Ester	Isobutyl acetate	C6H12O2	110-19-0	772
208	Ester	2-Butenoic acid, 3-methyl-, methyl ester	C6H10O2	924-50-5	842
209	Ether	2,3-Dimethylanisole	C9H12O	2944-49-2	1144
210	Halogenated hydrocarbons	2-Propenoic acid, 2-methyl-, 2-chloroethyl ester	C6H9ClO2	1888-94-4	977
211	Halogenated hydrocarbons	bromo-Cyclopentane	C5H9Br	137-43-9	857
212	Halogenated hydrocarbons	1H-1,2,4-Triazole, 3-chloro-	C2H2ClN3	6818-99-1	1237
213	Heterocyclic compound	Furan, 2-(1,2-diethoxyethyl)-	C10H16O3	14133-54-1	1269
214	Heterocyclic compound	3,5-Dimethyl-1-butylpyrazole	C9H16N2	2655-37-0	1192
215	Heterocyclic compound	3,6-Dimethyl-2,3,3a,4,5,7a-hexahydrobenzofuran	C10H16O	70786-44-6	1192
216	Heterocyclic compound	Pyridine, 2-pentyl-	C10H15N	2294-76-0	1202
217	Heterocyclic compound	Pyridine, 3-(3,4-dihydro-2H-pyrrol-5-yl)-	C9H10N2	532-12-7	1427
218	Heterocyclic compound	1,3-Dioxolane, 4-methyl-2-(2-methylpropyl)-	C8H16O2	18433-93-7	940
219	Heterocyclic compound	Piperidin-3-one, 2,2,5-methyl-	C8H15NO	103634-57-7	1232
220	Heterocyclic compound	2,6-Piperidinedione, 3-ethyl-	C7H11NO2	25115-69-9	1215
221	Heterocyclic compound	3-Butylthiophene	C8H12S	34722-01-5	1093
222	Heterocyclic compound	2-Picoline, 6-nitro-	C6H6N2O2	18368-61-1	1183
223	Heterocyclic compound	4,4'-Bitriazolyl	C4H4N6	16227-15-9	1286
224	Heterocyclic compound	3-Methyl-pyrrolo(2,3-b)pyrazine	C7H7N3	20321-99-7	1252
225	Heterocyclic compound	Furan, 2-butyltetrahydro-	C8H16O	1004-29-1	1004
226	Heterocyclic compound	Maltol	C6H6O3	118-71-8	1110
227	Heterocyclic compound	Ethanone, 1-(2-thienyl)-	C6H6OS	88-15-3	1092
228	Heterocyclic compound	Pyridine, 3-propyl-	C8H11N	4673-31-8	986
229	Heterocyclic compound	3-Imidazol-1-ylpropanenitrile	C6H7N3	23996-53-4	1159
230	Heterocyclic compound	2-Methyl-1,3-dithiacyclopentane	C4H8S2	5616-51-3	1026
231	Heterocyclic compound	N-Acetylisoxazolidine	C5H9NO2	115615-36-6	937
232	Heterocyclic compound	3-Methyl-4,5-diamino-1,2,4(4H)-triazole	C3H7N5	21532-07-0	1219
233	Heterocyclic compound	1-(2-Hydroxyethyl)-1,2,4-triazole	C4H7N3O	3273-14-1	1095
234	Heterocyclic compound	2(5H)-Furanone, 5-ethyl-	C6H8O2	2407-43-4	966
235	Heterocyclic compound	1-ethenyl-2-Pyrrolidinone	C6H9NO	88-12-0	1102
236	Heterocyclic compound	1H-Imidazole, 1-acetyl-	C5H6N2O	2466-76-4	950
237	Heterocyclic compound	Pyridine, 2,3-dimethyl-	C7H9N	583-61-9	943
238	Heterocyclic compound	2-Pyrrolidinone, 1-methyl-	C5H9NO	872-50-4	1044
239	Heterocyclic compound	1H-Pyrazole, 4,5-dihydro-5,5-dimethyl-	C5H10N2	4320-85-8	983
240	Heterocyclic compound	1,7-Diazabicyclo[2.2.0]heptane	C5H10N2	279-42-5	939
241	Heterocyclic compound	4-Aminopyridine	C5H6N2	504-24-5	1158
242	Heterocyclic compound	3H-1,2,4-Triazol-3-one, 1,2-dihydro-	C2H3N3O	930-33-6	1012
243	Heterocyclic compound	Fomepizole	C4H6N2	7554-65-6	921
244	Heterocyclic compound	1H-Tetrazole	CH2N4	288-94-8	1019
245	Hydrocarbons	Tetracosane	C24H50	646-31-1	2400
246	Hydrocarbons	Pentadecane, 2,6,10,14-tetramethyl-	C19H40	1921-70-6	1690
247	Hydrocarbons	Heptadecane, 2-methyl-	C18H38	1560-89-0	1765
248	Hydrocarbons	Hexadecane, 7,9-dimethyl-	C18H38	21164-95-4	1682
249	Hydrocarbons	Heptadecane, 3-methyl-	C18H38	6418-44-6	1769
250	Hydrocarbons	Heptadecane	C17H36	629-78-7	1700
251	Hydrocarbons	1,E-11,Z-13-Hexadecatriene	C16H28	80634-97-5	1618
252	Hydrocarbons	Nonane, 5-methyl-5-propyl-	C13H28	17312-75-3	1229
253	Hydrocarbons	Undecane, 4,4-dimethyl-	C13H28	17312-68-4	1229
254	Hydrocarbons	Decane, 3-ethyl-3-methyl-	C13H28	17312-66-2	1229
255	Hydrocarbons	Undecane, 3,5-dimethyl-	C13H28	17312-81-1	1207
256	Hydrocarbons	1-Tridecene	C13H26	2437-56-1	1292
257	Hydrocarbons	1-Tridecyne	C13H24	26186-02-7	1297
258	Hydrocarbons	Decane, 2,4-dimethyl-	C12H26	2801-84-5	1106
259	Hydrocarbons	Heptane, 2,2,4,6,6-pentamethyl-	C12H26	13475-82-6	990
260	Hydrocarbons	Dodecane	C12H26	112-40-3	1200
261	Hydrocarbons	1-Undecene, 9-methyl-	C12H24	74630-41-4	1152
262	Hydrocarbons	1-Dodecene	C12H24	112-41-4	1190
263	Hydrocarbons	4-Undecene, 3-methyl-, (Z)-	C12H24	74645-87-7	1158
264	Hydrocarbons	Cyclooctane, 1,5-dimethyl-2,6-bis(methylene)-	C12H20	74301-13-6	1215
265	Hydrocarbons	Albene	C12H18	38451-64-8	1159
266	Hydrocarbons	Octane, 5-ethyl-2-methyl-	C11H24	62016-18-6	986
267	Hydrocarbons	Nonane, 2,5-dimethyl-	C11H24	17302-27-1	1021
268	Hydrocarbons	1,10-Undecadiene	C11H20	13688-67-0	1095
269	Hydrocarbons	(Z)-2,2-Dimethyl-3-(3-methylpenta-2,4-dien-1-yl)oxirane	C10H16O	33281-83-3	1133
270	Hydrocarbons	Cyclohexene, 2,4-dimethyl-1-(1-methylethenyl)-	C11H18	56763-60-1	1108
271	Hydrocarbons	Decane	C10H22	124-18-5	1000
272	Hydrocarbons	Heptane, 3-ethyl-2-methyl-	C10H22	14676-29-0	941
273	Hydrocarbons	cis-2,6-Dimethyl-2,6-octadiene	C10H18	2492-22-0	985
274	Hydrocarbons	1,5-Cyclooctadiene, 1,6-dimethyl-	C10H16	3760-13-2	1103
275	Hydrocarbons	Santolina triene	C10H16	2153-66-4	908
276	Hydrocarbons	Cyclobutanespiro-2'-bicyclo[1.1.0]butane-4'-spirocyclobutane	C10H14	76308-11-7	930
277	Hydrocarbons	Hexane, 3-ethyl-2-methyl-	C9H20	16789-46-1	845
278	Hydrocarbons	Cyclopentane, butyl-	C9H18	2040-95-1	937
279	Hydrocarbons	Cyclopentene, 1-butyl-	C9H16	2423-01-0	938
280	Hydrocarbons	1,5-Heptadiene, 2,6-dimethyl-	C9H16	6709-39-3	856
281	Hydrocarbons	3,3-Dimethyl-6-methylenecyclohexene	C9H14	20185-16-4	1001
282	Hydrocarbons	Octane	C8H18	111-65-9	800
283	Hydrocarbons	E-1-Methoxy-4-hexene	C7H14O	134777-60-9	801
284	Hydrocarbons	1-Octene	C8H16	111-66-0	789
285	Hydrocarbons	5-Hexenal, 4-methylene-	C7H10O	17844-21-2	897
286	Ketone	2-Butanone, 4-(2,6,6-trimethyl-1,3-cyclohexadien-1-yl)-	C13H20O	20483-36-7	1424
287	Ketone	Cyclohexanone, 2-(1-mercapto-1-methylethyl)-5-methyl-	C10H18OS	38462-22-5	1369
288	Ketone	3-Hexanone, 1-phenyl-	C12H16O	29898-25-7	1427
289	Ketone	4-Undecanone	C11H22O	14476-37-0	1208
290	Ketone	7-Oxabicyclo[4.1.0]heptan-2-one, 6-methyl-3-(1-methylethyl)-	C10H16O2	5286-38-4	1256
291	Ketone	2H-Pyran-2-one, tetrahydro-6-(2-pentenyl)-, (Z)-	C10H16O2	25524-95-2	1518
292	Ketone	2,7-Nonadien-5-one, 4,6-dimethyl-	C11H18O	74630-80-1	1138
293	Ketone	Piperitenone oxide	C10H14O2	35178-55-3	1368
294	Ketone	Ethanone, 1-(2-methyl-1,3-dithiolan-2-yl)-	C6H10OS2	33266-07-8	1252
295	Ketone	1-Decen-3-one	C10H18O	56606-79-2	1141
296	Ketone	5-Nonen-4-one, 6-methyl-	C10H18O	7036-98-8	1136
297	Ketone	Cyclopentanone, 2-(3-methyl-2-buten-1-yl)-	C10H16O	2520-60-7	1215
298	Ketone	5,7-Octadien-4-one, 2,6-dimethyl-, (E)-	C10H16O	6752-80-3	1146
299	Ketone	2-Acetyl-4,4-dimethyl-cyclopent-2-enone	C9H12O2	81979-96-6	1213
300	Ketone	Ethanone, 1-(2,4-dihydroxyphenyl)-	C8H8O3	89-84-9	1276
301	Ketone	Ketone, methyl 2,4,5-trimethylpyrrol-3-yl	C9H13NO	19005-95-9	1303
302	Ketone	2(1H)-Naphthalenone, 3,4,5,6,7,8-hexahydro-	C10H14O	13837-12-2	1312
303	Ketone	(Z)-2,6-Dimethylocta-2,5,7-trien-4-one	C10H14O	33746-71-3	1231
304	Ketone	Ethanone, 1-(3,5-dimethylpyrazinyl)-	C8H10N2O	54300-08-2	1174
305	Ketone	Paroxypropione	C9H10O2	70-70-2	1349
306	Ketone	2-Butanone, 4-phenyl-	C10H12O	2550-26-7	1236
307	Ketone	Ethanone, 1-(2,4-dimethylphenyl)-	C10H12O	89-74-7	1253
308	Ketone	2-Heptanone, 4,6-dimethyl-	C9H18O	19549-80-5	1045
309	Ketone	2(5H)-Furanone, 5-ethyl-3-hydroxy-4-methyl-	C7H10O3	698-10-2	1195
310	Ketone	3-Octen-2-one, 7-methyl-	C9H16O	33046-81-0	1113
311	Ketone	Cyclohexanone, 2,2,6-trimethyl-	C9H16O	2408-37-9	1036
312	Ketone	1H-Pyrrole-2,5-dione, 3-ethyl-4-methyl-	C7H9NO2	20189-42-8	1239
313	Ketone	Bicyclo[3.1.1]heptan-2-one, 6,6-dimethyl-	C9H14O	24903-95-5	1137
314	Ketone	Ethanone, 1-(2-aminophenyl)-	C8H9NO	551-93-9	1308
315	Ketone	Benzyl methyl ketone	C9H10O	103-79-7	1124
316	Ketone	1-Octen-3-one	C8H14O	4312-99-6	976
317	Ketone	5-Methyl-(E)-2-hepten-4-one	C8H14O	102322-83-8	972
318	Ketone	5-Hepten-2-one, 6-methyl-	C8H14O	110-93-0	986
319	Ketone	Isomaltol	C6H6O3	3420-59-5	989
320	Ketone	2-Cyclohexen-1-one, 3-methyl-	C7H10O	1193-18-6	1075
321	Ketone	2-Hexanone	C6H12O	591-78-6	792
322	Ketone	3-Penten-2-one, 4-methyl-	C6H10O	141-79-7	798
323	Ketone	Cyclohexanone	C6H10O	108-94-1	894
324	Ketone	4-Hexen-3-one	C6H10O	2497-21-4	855
325	Ketone	2-Cyclohexen-1-one	C6H8O	930-68-7	920
326	Nitrogen compounds	Tricyclo[3.3.1.1(3,7)]decane, 2-nitro-	C10H15NO2	54564-31-7	1224
327	Nitrogen compounds	Benzene, (1-nitropropyl)-	C9H11NO2	5279-14-1	1310
328	Nitrogen compounds	2,6-Octadienenitrile, 3,7-dimethyl-, (Z)-	C10H15N	31983-27-4	1231
329	Nitrogen compounds	2-Nonenenitrile	C9H15N	29127-83-1	1194
330	Nitrogen compounds	Cyclobutanecarbonitrile, 3,3-dimethyl-	C7H11N	53783-86-1	921
331	Phenol	Phenol, 2-methyl-5-(1-methylethyl)-	C10H14O	499-75-2	1299
332	Phenol	Phenol, m-tert-butyl-	C10H14O	585-34-2	1296
333	Phenol	Phenol, p-tert-butyl-	C10H14O	98-54-4	1295
334	Phenol	Phenol, 4-propyl-	C9H12O	645-56-7	1260
335	Phenol	Phenol, 3,5-dimethyl-	C8H10O	108-68-9	1171
336	Sulfur compounds	Furan, 2-[(methyldithio)methyl]-	C6H8OS2	57500-00-2	1226
337	Sulfur compounds	DiSulfur compounds, ethyl 1-methylethyl	C5H12S2	53966-36-2	985
338	Sulfur compounds	2-Thiophenemethanethiol	C5H6S2	6258-63-5	1105
339	Sulfur compounds	Diethyl diSulfur compounds	C4H10S2	110-81-6	927
340	Sulfur compounds	3-Mercapto-3-methylbutanol	C5H12OS	34300-94-2	970
341	Sulfur compounds	DiSulfur compounds, methyl 2-propenyl	C4H8S2	2179-58-0	920
342	Terpenes	2H-Pyran-3-ol, tetrahydro-2,2,6-trimethyl-6-(4-methyl-3-cyclohexen-1-yl)-, [3S-[3.alpha.,6.alpha.(R*)]]-	C15H26O2	22567-36-8	1745
343	Terpenes	Spiro[4.5]decan-7-one, 1,8-dimethyl-8,9-epoxy-4-isopropyl-	C15H24O2	61050-91-7	1626
344	Terpenes	(1R,1aR,2aS,5R,6R,6aS,7aS)-1,6,6a-trimethyldecahydro-1,2a-methanocyclopropa[b]naphthalen-5-ol	C15H24O	860769-47-7	1431
345	Terpenes	(1R,3E,7E,11R)-1,5,5,8-Tetramethyl-12-oxabicyclo[9.1.0]dodeca-3,7-diene	C15H24O	19888-34-7	1606
346	Terpenes	2,6,11-Dodecatrienal, 2,6-dimethyl-10-methylene-	C15H22O	60066-88-8	1695
347	Terpenes	1H-Cycloprop[e]azulene, decahydro-1,1,4,7-tetramethyl-, [1aR-(1a.alpha.,4.beta.,4a.beta.,7.beta.,7a.beta.,7b.alpha.)]-	C15H26	28580-43-0	1373
348	Terpenes	Caryophyllene	C15H24	87-44-5	1419
349	Terpenes	(1R,4R,4aS,8aR)-4,7-Dimethyl-1-(prop-1-en-2-yl)-1,2,3,4,4a,5,6,8a-octahydronaphthalene	C15H24	92692-39-2	1458
350	Terpenes	1H-3a,7-Methanoazulene, 2,3,4,7,8,8a-hexahydro-3,6,8,8-tetramethyl-, [3R-(3.alpha.,3a.beta.,7.beta.,8a.alpha.)]-	C15H24	469-61-4	1411
351	Terpenes	Cedrene	C15H24	11028-42-5	1422
352	Terpenes	cis-.alpha.-Bergamotene	C15H24	18252-46-5	1415
353	Terpenes	Cyclohexene, 4-ethenyl-4-methyl-3-(1-methylethenyl)-1-(1-methylethyl)-, (3R-trans)-	C15H24	20307-84-0	1338
354	Terpenes	.alpha.-Calacorene	C15H20	21391-99-1	1542
355	Terpenes	(-)-Bornyl acetate	C12H20O2	5655-61-8	1287
356	Terpenes	.alpha.-Ionone	C13H20O	127-41-3	1426
357	Terpenes	2-Buten-1-one, 1-(2,6,6-trimethyl-1,3-cyclohexadien-1-yl)-, (E)-	C13H18O	23726-93-4	1386
358	Terpenes	2-Methylisoborneol	C11H20O	2371-42-8	1198
359	Terpenes	7-Oxabicyclo[4.1.0]heptan-2-one, 3-methyl-6-(1-methylethyl)-	C10H16O2	5729-99-7	1261
360	Terpenes	2-Oxabicyclo[2.2.2]octan-6-one, 1,3,3-trimethyl-	C10H16O2	107598-08-3	1217
361	Terpenes	2-Cyclohexen-1-one, 2-hydroxy-3-methyl-6-(1-methylethyl)-	C10H16O2	490-03-9	1302
362	Terpenes	Geranic acid	C10H16O2	459-80-3	1355
363	Terpenes	6,7-Dimethyl-1,2,3,5,8,8a-hexahydronaphthalene	C12H18	107914-92-1	1273
364	Terpenes	Cyclohexanol, 5-methyl-2-(1-methylethyl)-, (1.alpha.,2.alpha.,5.alpha.)-	C10H20O	491-02-1	1187
365	Terpenes	2H-Pyran, tetrahydro-4-methyl-2-(2-methyl-1-propenyl)-	C10H18O	16409-43-1	1111
366	Terpenes	(E)-sabinene hydrate	C10H18O	17699-16-0	1070
367	Terpenes	(+)-neodihydrocarveol	C10H18O	18675-33-7	1226
368	Terpenes	3,6-Octadien-1-ol, 3,7-dimethyl-, (Z)-	C10H18O	5944-20-7	1240
369	Terpenes	2-methyl-5-(1-methylethenyl)-Cyclohexanol	C10H18O	619-01-2	1196
370	Terpenes	Ethanol, 2-(3,3-dimethylcyclohexylidene)-, (Z)-	C10H18O	26532-23-0	1267
371	Terpenes	6-Octen-1-ol, 7-methyl-3-methylene-	C10H18O	13066-51-8	1195
372	Terpenes	Bicyclo[2.2.1]heptan-2-ol, 1,7,7-trimethyl-, (1S-endo)-	C10H18O	464-45-9	1170
373	Terpenes	Cyclobutaneethanol, 1-methyl-2-(1-methylethenyl)-, cis-	C10H18O	30820-22-5	1183
374	Terpenes	Citronellal	C10H18O	106-23-0	1153
375	Terpenes	(Z)-sabinene hydrate	C10H18O	15537-55-0	1070
376	Terpenes	Cyclohexanone, 5-methyl-2-(1-methylethyl)-, cis-	C10H18O	491-07-6	1164
377	Terpenes	2,6-Octadienal, 3,7-dimethyl-, (E)-	C10H16O	141-27-5	1270
378	Terpenes	2,7-Octadien-4-ol, 2-methyl-6-methylene-, (S)-	C10H16O	35628-00-3	1147
379	Terpenes	Thujone	C10H16O	546-80-5	1103
380	Terpenes	Bicyclo[3.1.1]hept-2-ene-2-methanol, 6,6-dimethyl-	C10H16O	515-00-4	1195
381	Terpenes	cis-Dihydrocarvone	C10H16O	3792-53-8	1195
382	Terpenes	Ethanone, 1-(1,4-dimethyl-3-cyclohexen-1-yl)-	C10H16O	43219-68-7	1149
383	Terpenes	trans-Carveol	C10H16O	1197-07-5	1217
384	Terpenes	Isocyclocitral	C10H16O	1335-66-6	1163
385	Terpenes	2-Cyclopenten-1-one, 2-pentyl-	C10H16O	25564-22-1	1292
386	Terpenes	(-)-trans-Isopiperitenol	C10H16O	74410-00-7	1210
387	Terpenes	2H-Pyran, 3,6-dihydro-4-methyl-2-(2-methyl-1-propenyl)-	C10H16O	1786-08-9	1154
388	Terpenes	(+)-(E)-Limonene oxide	C10H16O	6909-30-4	1139
389	Terpenes	Cyclohexanone, 5-methyl-2-(1-methylethylidene)-	C10H16O	15932-80-6	1212
390	Terpenes	2-Cyclohexen-1-ol, 2-methyl-5-(1-methylethenyl)-, cis-	C10H16O	1197-06-4	1229
391	Terpenes	Tricyclo[2.2.1.0(2,6)]heptane-3-methanol, 2,3-dimethyl-	C10H16O	29550-55-8	1286
392	Terpenes	Citral	C10H16O	5392-40-5	1273
393	Terpenes	7-Oxabicyclo[4.1.0]heptane, 1-methyl-4-(1-methylethenyl)-	C10H16O	1195-92-2	1133
394	Terpenes	Bicyclo[3.1.1]heptan-3-ol, 6,6-dimethyl-2-methylene-, [1S-(1.alpha.,3.alpha.,5.alpha.)]-	C10H16O	547-61-5	1139
395	Terpenes	1-Cyclohexene-1-carboxaldehyde, 4-(1-methylethyl)-	C10H16O	21391-98-0	1276
396	Terpenes	o-Mentha-1(7),8-dien-3-ol	C10H16O	15358-81-3	1201
397	Terpenes	Ethanone, 1-(1,3-dimethyl-3-cyclohexen-1-yl)-	C10H16O	51733-68-7	1161
398	Terpenes	(S)-(-)-(4-Isopropenyl-1-cyclohexenyl)methanol	C10H16O	18457-55-1	1312
399	Terpenes	Limonene oxide, trans-	C10H16O	4959-35-7	1138
400	Terpenes	p-Mentha-1,8-dien-7-ol	C10H16O	536-59-4	1296
401	Terpenes	Bicyclo[3.1.1]hept-3-en-2-one, 4,6,6-trimethyl-, (1S)-	C10H14O	1196-01-6	1204
402	Terpenes	D-Verbenone	C10H14O	18309-32-5	1228
403	Terpenes	(-)-Carvone	C10H14O	6485-40-1	1254
404	Terpenes	Furan, 3-(4-methyl-3-pentenyl)-	C10H14O	539-52-6	1101
405	Terpenes	2,6,6-Trimethylbicyclo[3.2.0]hept-2-en-7-one	C10H14O	4613-37-0	1108
406	Terpenes	2,4-Cycloheptadien-1-one, 2,6,6-trimethyl-	C10H14O	503-93-5	1243
407	Terpenes	1,3-Cyclohexadiene-1-carboxaldehyde, 2,6,6-trimethyl-	C10H14O	116-26-7	1201
408	Terpenes	Pinocarvone	C10H14O	30460-92-5	1164
409	Terpenes	Anethole	C10H12O	104-46-1	1287
410	Terpenes	1,6-Octadiene, 3,7-dimethyl-	C10H18	2436-90-0	946
411	Terpenes	1,5-Cyclooctadiene, 3,4-dimethyl-	C10H16	21284-05-9	1046
412	Terpenes	Alpha-Ocimene	C10H16	502-99-8	1048
413	Terpenes	1,3-Cyclohexadiene, 1,5,5,6-tetramethyl-	C10H16	514-94-3	976
414	Terpenes	2,4,6-Octatriene, 2,6-dimethyl-, (E,E)-	C10H16	3016-19-1	1144
415	Terpenes	Bicyclo[3.1.1]hept-2-ene, 3,6,6-trimethyl-	C10H16	4889-83-2	948
416	Terpenes	.alpha.-Phellandrene 1	C10H16	99-83-2	1006
417	Terpenes	Bicyclo[3.1.1]heptane, 6,6-dimethyl-2-methylene-, (1S)-	C10H16	18172-67-3	943
418	Terpenes	2,4,6-Octatriene, 2,6-dimethyl-	C10H16	673-84-7	1131
419	Terpenes	1,7-Octadiene, 2-methyl-6-methylene-	C10H16	1686-30-2	984
420	Terpenes	1,7,7-trimethyl-Tricyclo[2.2.1.0(2,6)]heptane	C10H16	508-32-7	925
421	Terpenes	Bicyclo[2.2.1]heptane, 7,7-dimethyl-2-methylene-	C10H16	471-84-1	950
422	Terpenes	3-Carene	C10H16	13466-78-9	1009
423	Terpenes	(+)-alpha-Pinene	C10H16	7785-70-8	932
424	Terpenes	.alpha.-Pinene	C10H16	80-56-8	937
425	Terpenes	trans-.beta.-Ocimene	C10H16	3779-61-1	1049
426	Terpenes	2,6-Dimethyl-1,3,5,7-octatetraene, E,E-	C10H14	460-01-5	1131
427	Terpenes	Bicyclo[3.1.0]hex-2-ene, 4-methylene-1-(1-methylethyl)-	C10H14	36262-09-6	956
428	Terpenes	1,3,8-p-Menthatriene	C10H14	18368-95-1	1119
429	Terpenes	Dicyclopentadiene	C10H12	77-73-6	1003
430	Others	2-Methylbutanoic anhydride	C10H18O3	1468-39-9	1190
431	Others	Butanoic acid, anhydride	C8H14O3	106-31-0	1120
432	Others	2-Dimethylamino-4-methyl-pent-4-enenitrile	C8H14N2	94492-10-1	1014
